# Supplementary material for: Making Decision-Making Visible- Teaching the Process of Evaluating Interventions
Source: Preprints.org preprint supplement (doi:10.20944/preprints202102.0179.v1), 2021-02-08
Supplement: Supplementary file 1 [file supplementary]

Archive with 7 entries (7 files):
- Zip files for submission/Appendix A. Intervention Rubric with quality indicators.docx
- Zip files for submission/Figure  2. Intuitive factors thought to affect handwriting dysfunction.docx
- Zip files for submission/Figure 1.Simple view of intervention selection.docx
- Zip files for submission/Figure 3. Preliminary causal map.docx
- Zip files for submission/Figure 4. Evidence-infomed causal model.docx
- Zip files for submission/Figure 5 the three part structure of treatment theory.docx
- Zip files for submission/Table 1. Making thinking visible- Evidence-informed causal model.docx
