# Supplementary material for: Making Decision-Making Visible- Teaching the Process of Evaluating Interventions
Source: Preprints.org preprint supplement (doi:10.20944/preprints202102.0179.v1), 2021-02-08
Supplement: Supplementary file 1 [file supplementary › Zip files for submission/Figure 1.Simple view of intervention selection.docx]

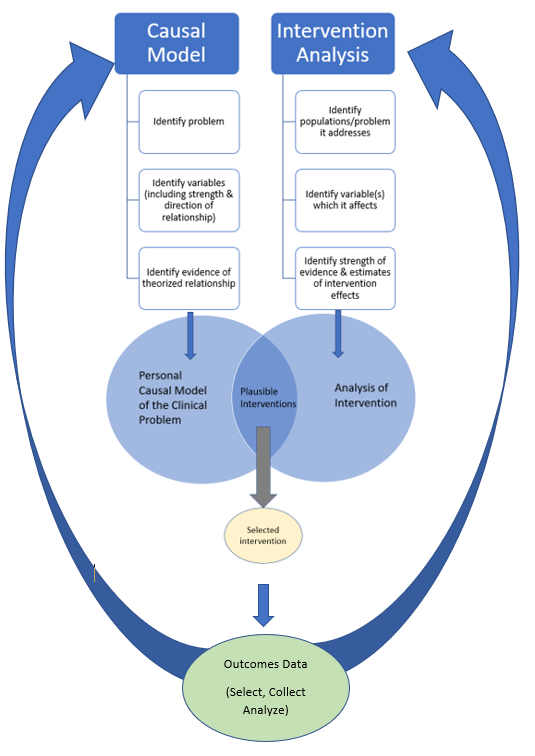


Figure 1. Simple view of intervention selection.*

*Diagram only contains the main steps of each process.
