# Supplementary material for: Making Decision-Making Visible- Teaching the Process of Evaluating Interventions
Source: Preprints.org preprint supplement (doi:10.20944/preprints202102.0179.v1), 2021-02-08
Supplement: Supplementary file 1 [file supplementary › Zip files for submission/Figure 3. Preliminary causal map.docx]

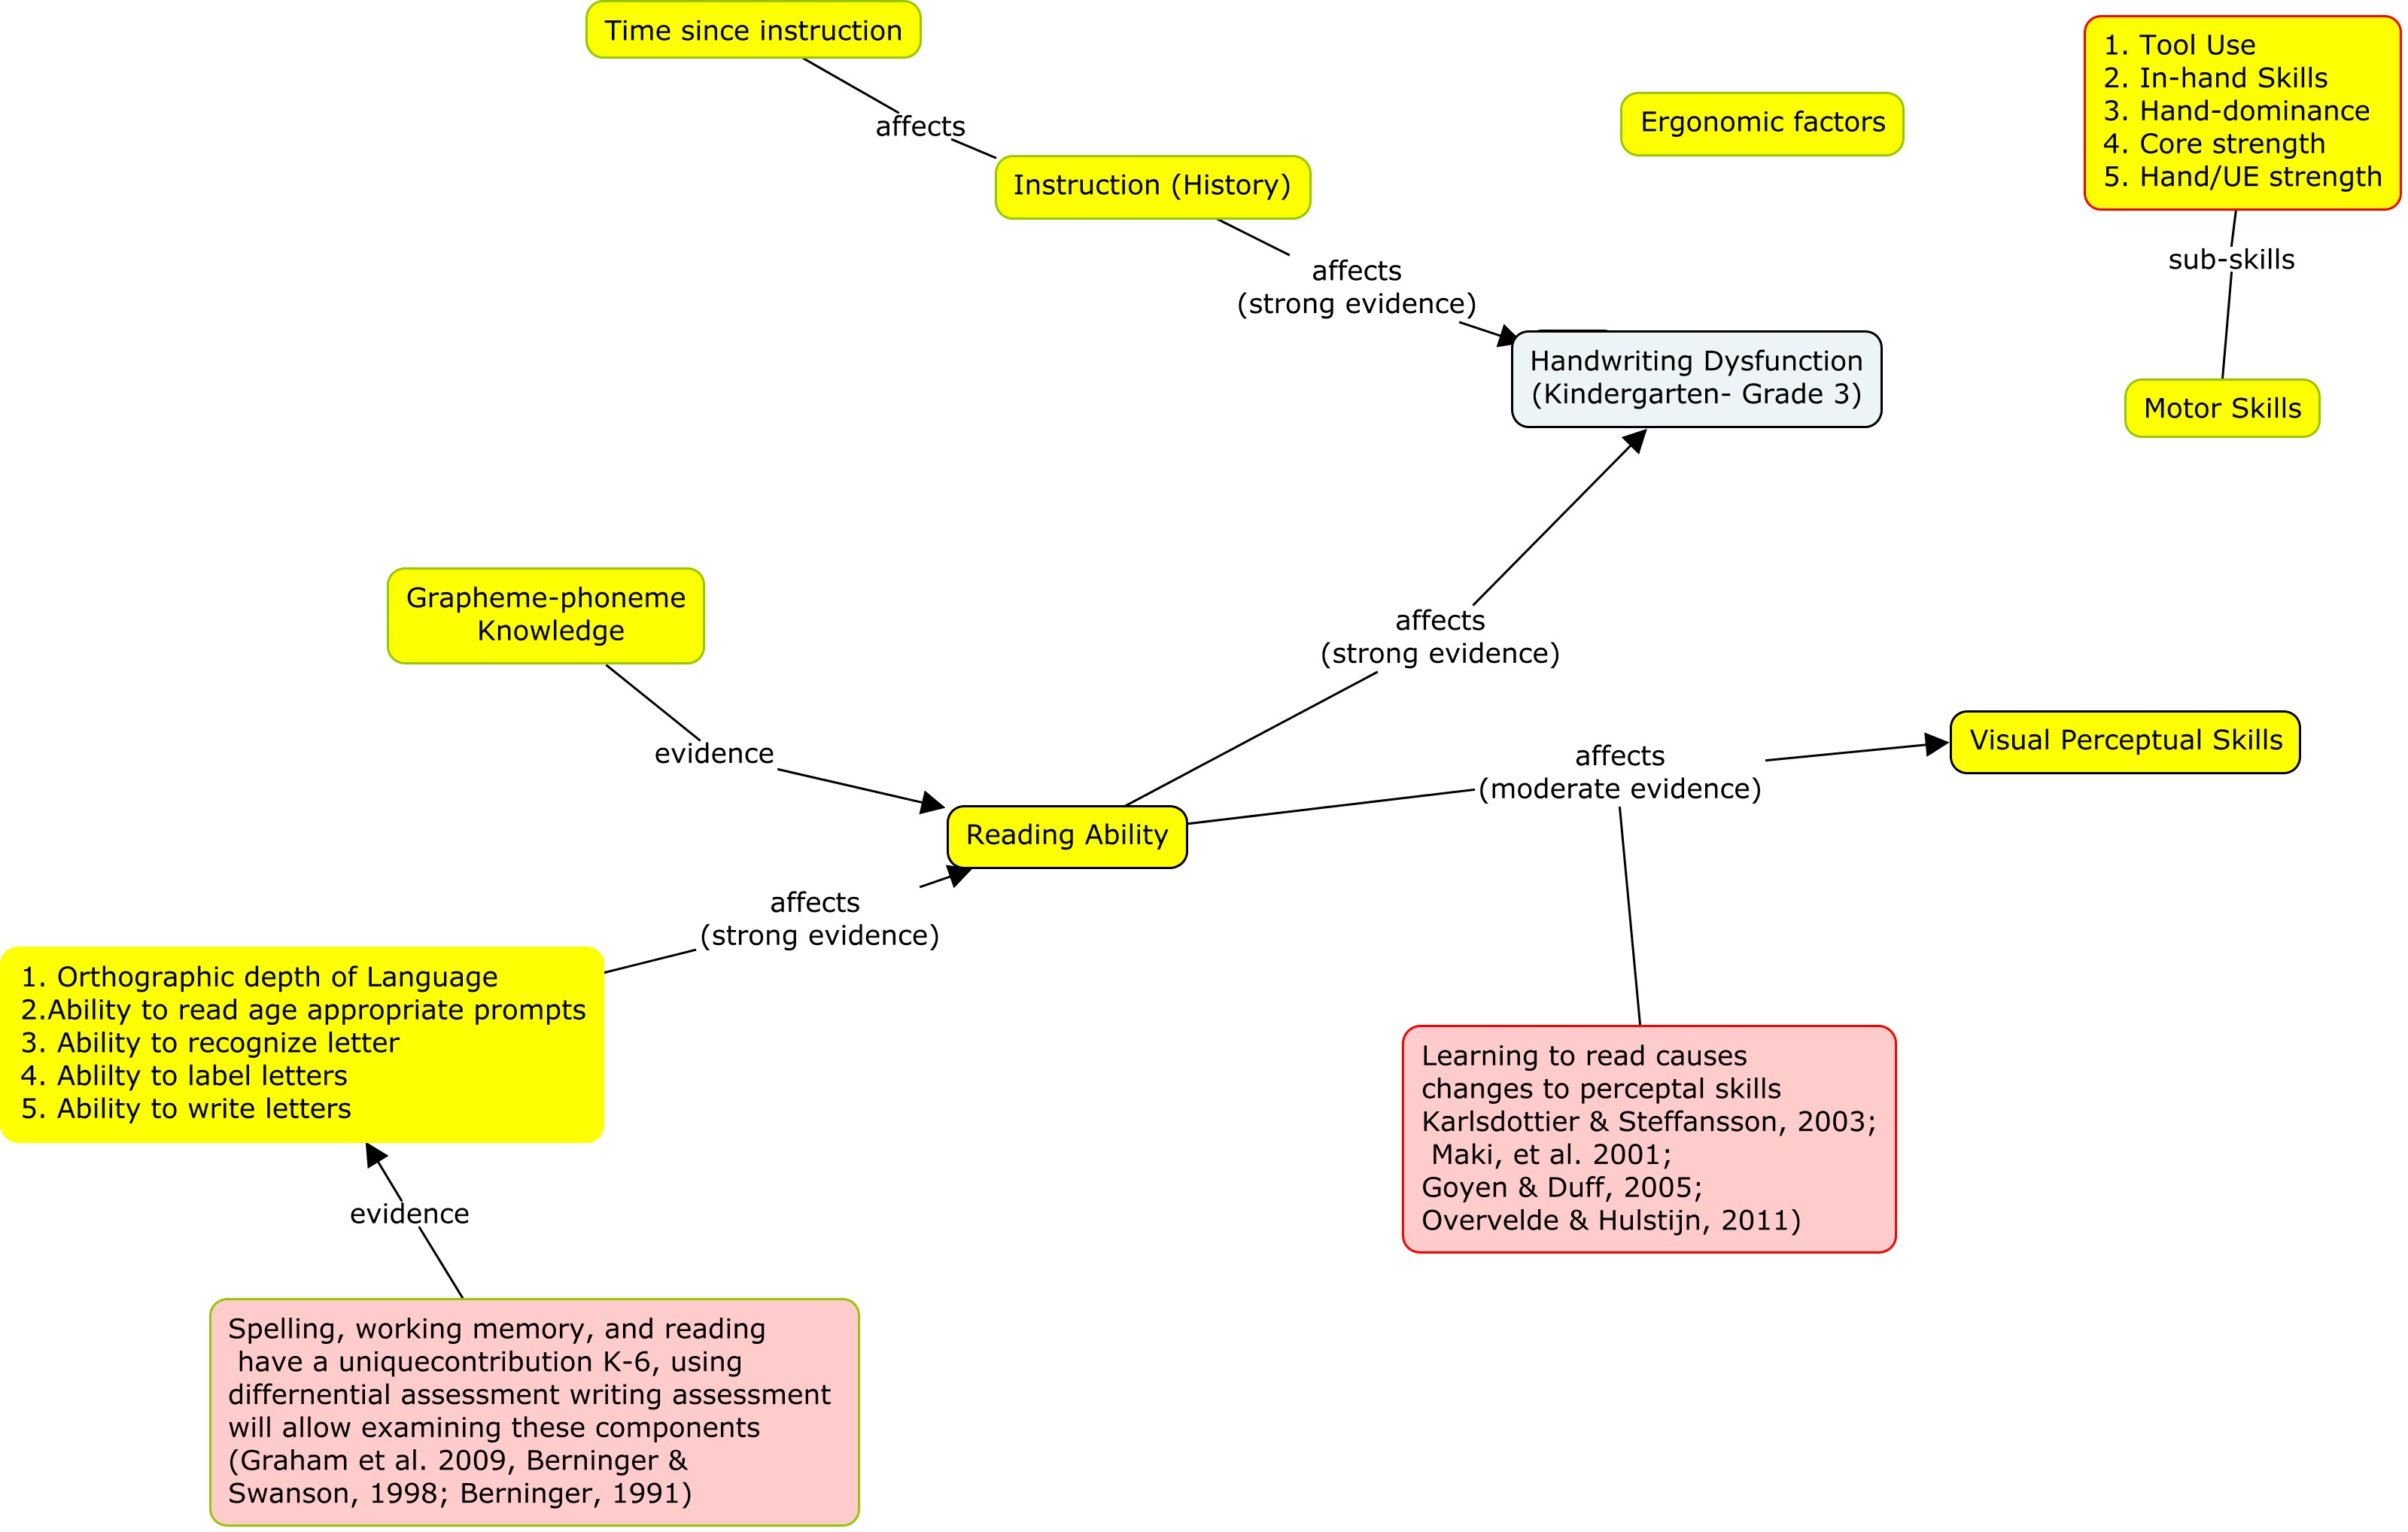
Figure 3: Preliminary causal model after searching the literature. It includes direction of causal relationship and strength of evidence supporting the relationship. Placing the evidence provides ability to confirm appraisal of evidence.
