# Supplementary material for: Making Decision-Making Visible- Teaching the Process of Evaluating Interventions
Source: Preprints.org preprint supplement (doi:10.20944/preprints202102.0179.v1), 2021-02-08
Supplement: Supplementary file 1 [file supplementary › Zip files for submission/Figure 4. Evidence-infomed causal model.docx]

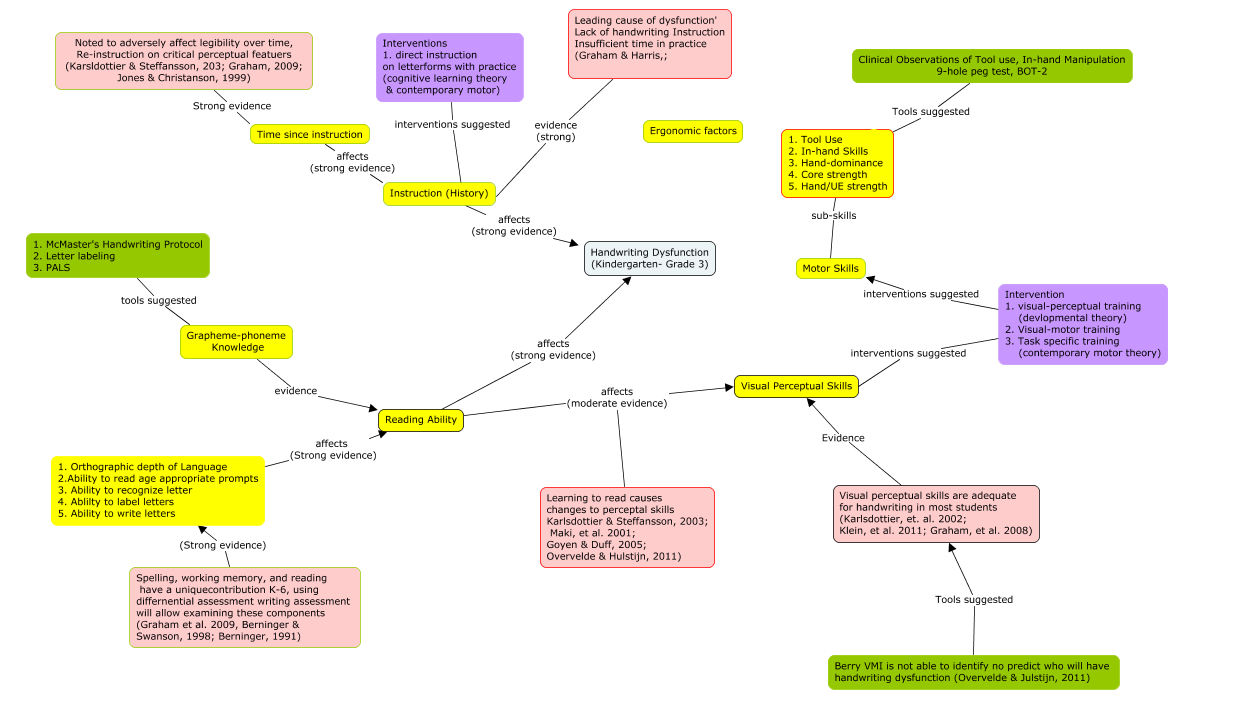
Figure 4: Evidence-informed causal model with interventions and assessment tools suggested in the literature.
