# Supplementary material for: Making Decision-Making Visible- Teaching the Process of Evaluating Interventions
Source: Preprints.org preprint supplement (doi:10.20944/preprints202102.0179.v1), 2021-02-08
Supplement: Supplementary file 1 [file supplementary › Zip files for submission/Table 1. Making thinking visible- Evidence-informed causal model.docx]

Table 1. Making thinking visible- Evidence-informed causal models

|  | Action |
| --- | --- |
| Step 1 | Identify possible problem(s), concepts, etc. |
| Step 2 | Reflect on your beliefs, knowledge, experiences, and place any variable which may be affecting the problem on the map |
| Step 3 | Seek empirical evidence and background information   1. relationship between the factor, the problem, and the outcome 2. a plausible explanation of how that factor “causes” the problem 3. evidence that the factor is remediable |
| Step 4 | Identify and link interventions to the variables they affect |
| Step 5 | Assess applicability, feasibility to context and client |
| Step 6 | Identify and collect outcomes data points locally which will allow assessing accuracy of decision |
| Step 7 | Reflect on outcomes data:  a) assess impact of intervention  b) assess accuracy of the action taken assess accuracy of causal model |
