# Supplementary figures and images for: Making Decision-Making Visible- Teaching the Process of Evaluating Interventions
Source: Preprints.org preprint supplement (doi:10.20944/preprints202102.0179.v1), 2021-02-08

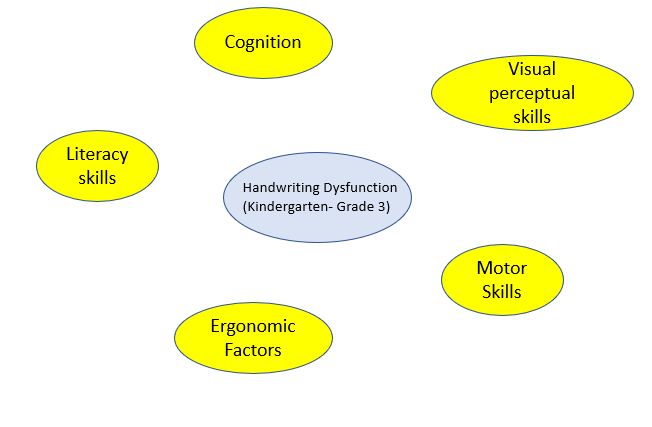


Figure 2. Intuitive factors thought to affect handwriting dysfunction

Supplement: Supplementary file 1 [file supplementary › Zip files for submission/Figure 2. Intuitive factors thought to affect handwriting dysfunction.docx]

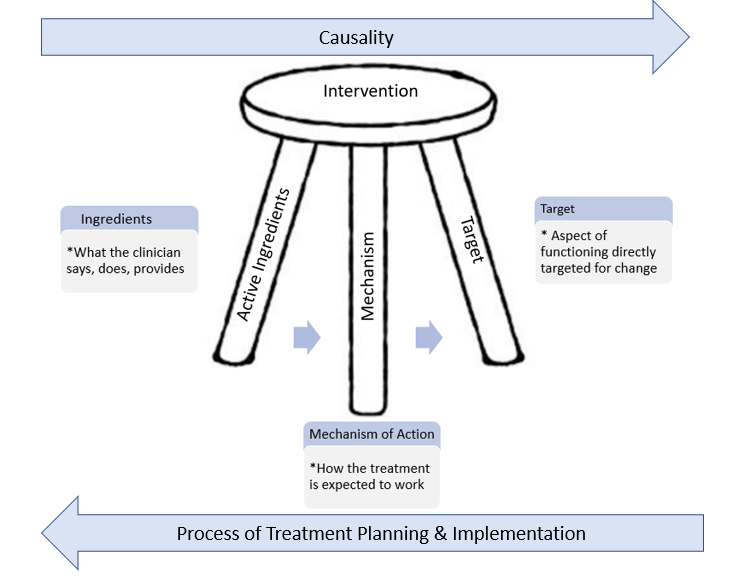


Figure 5. The Three-part structure of Intervention and Intervention Selection. Based on [83].

Supplement: Supplementary file 1 [file supplementary › Zip files for submission/Figure 5 the three part structure of treatment theory.docx]
